# Supplementary material
Source: PubMed Central journal article supplement (PMC5554714)
Supplement: NIHMS886767-supplement-s1.pdf [file NIHMS886767-supplement-s1.pdf]

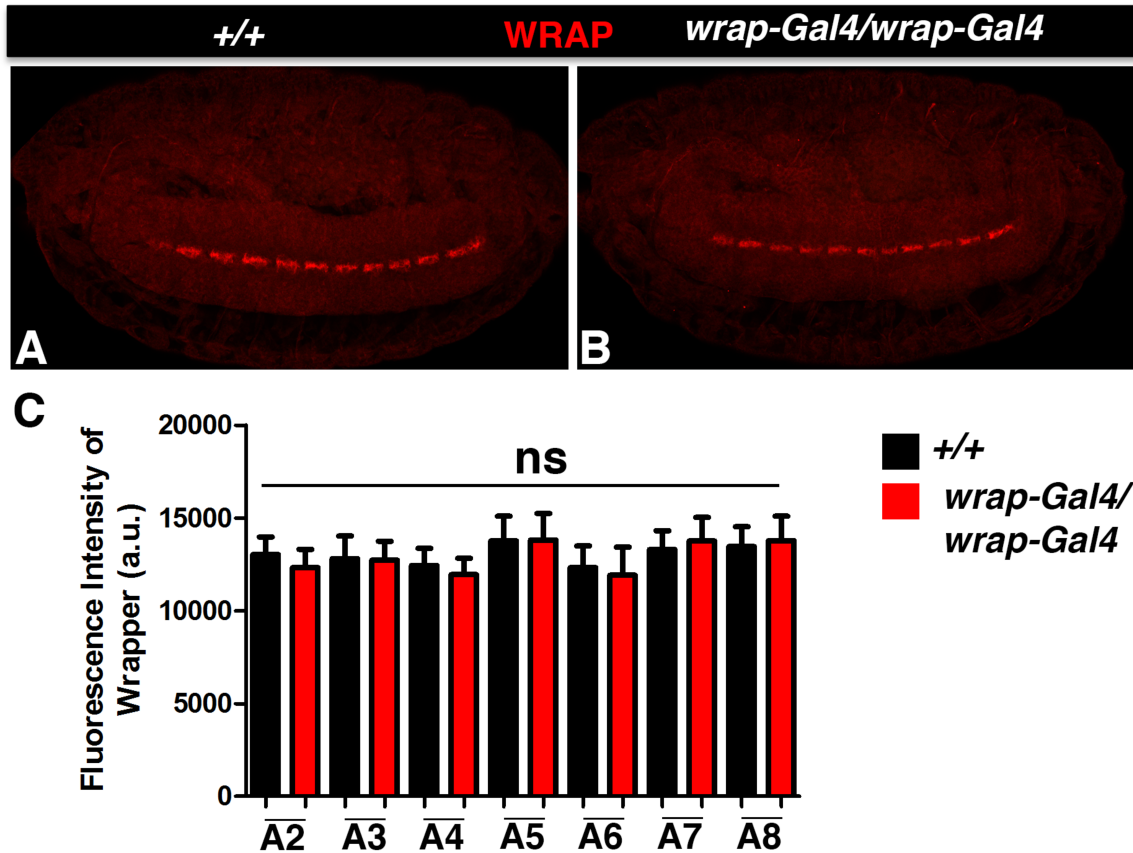

**SFigure 1. Wrapper levels are similar in wild type and homozygous *wrapper-Gal4* midline glia.**

(A, B) Low magnification confocal images of stage 16 embryos of wild type (A) and homozygous *wrapper-Gal4* (B) labeled with anti-Wrapper (red).

(C) Quantification of fluorescence intensity of Wrapper in segments A2-A8 reveal no significant differences in levels of Wrapper in MG of wild type and homozygous *wrapper-Gal4* embryos.

a.u.= arbitrary units

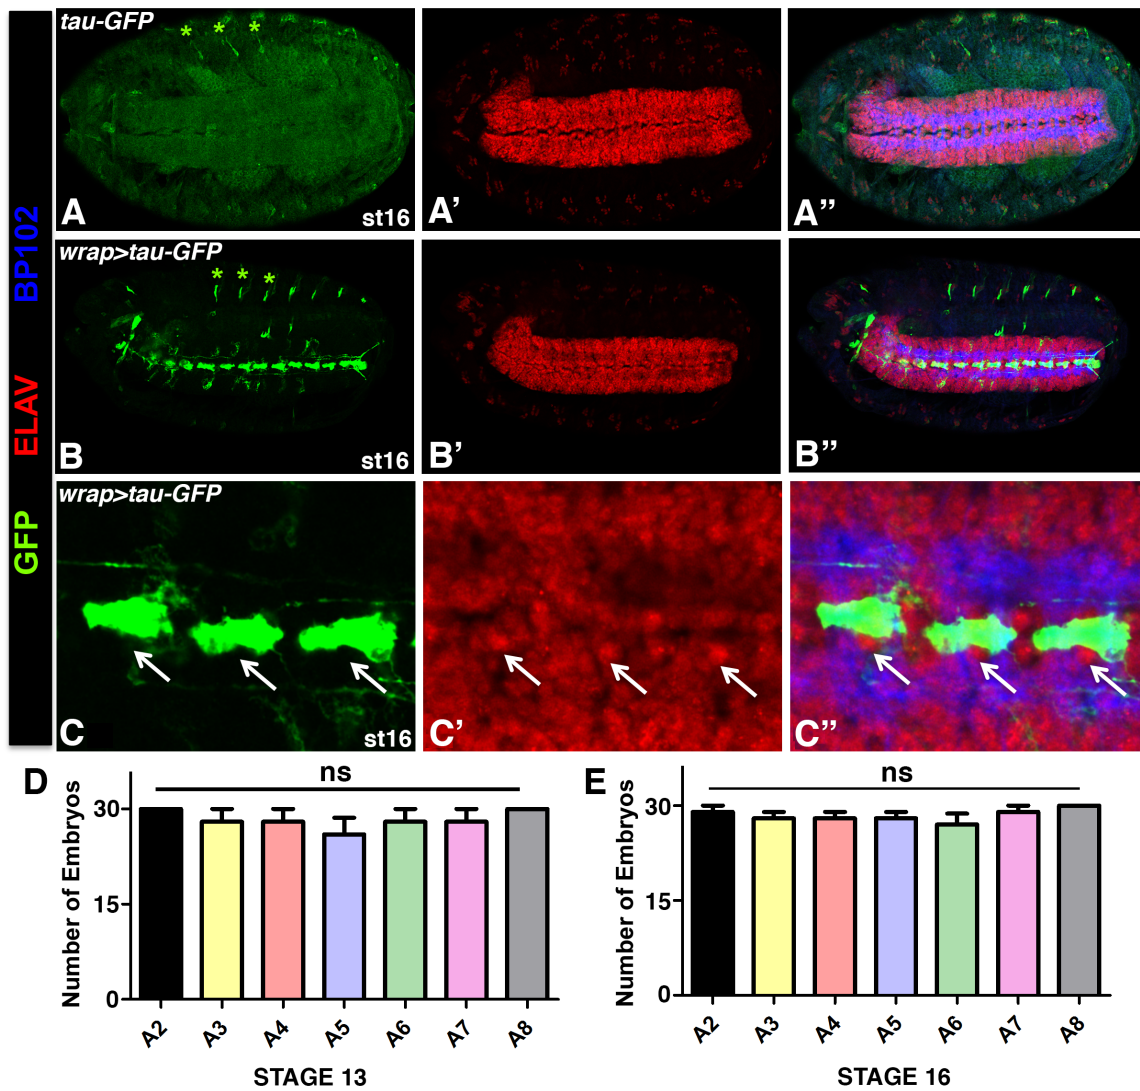

**SFigure 2. Expression of *wrapper-Gal4* in CNS midline glia.**

(A) Low magnification confocal image of stage 16 *UAS-tauGFP* embryo triple immunostained against GFP (A, green), neuronal nuclear marker, ELAV (A', red) and CNS axonal scaffold protein BP102 (A'', blue). The embryo shows a background expression of GFP (A, green asterisk) mostly in the periphery of the embryos.

(B-C) Low and high magnification confocal images of stage 16 embryos (B and C, respectively) of *wrapper-Gal4/UAS-tauGFP* display GFP expression in midline glial cells and processes (B, C) in addition to the background GFP expression (B, green asterisk) in the periphery. Midline glial cells expressing GFP seem to exclude the neuronal nuclei (arrows, C-C'').

(D, E) Quantification of MG processes in abdominal segments A2-A8 of Stage 13 (D) and Stage 16 (E) embryos show presence of MG process in all segments.
